# Supplementary material for: Encyclopedic tumor analysis for guiding treatment of advanced, broadly refractory cancers: results from the RESILIENT trial
Source: PubMed Central journal article supplement (PMC6771458; doi:10.18632/oncotarget.27188), 2019-09-24
Supplement: oncotarget-10-5605-s001.pdf [file oncotarget-10-5605-s001.pdf]

## Encyclopedic tumor analysis for guiding treatment of advanced, broadly refractory cancers: results from the RESILIENT trial

### SUPPLEMENTARY MATERIALS

Supplementary Table 1: Detailed stratification of cancer types

| Parameter                                     | ITT        | Evaluable  |
|-----------------------------------------------|------------|------------|
|                                               | Number (%) | Number (%) |
| <b>Bone</b>                                   | 4 (2.1%)   | 3 (2.4%)   |
| Chordoma                                      | 1          | 1          |
| Osteogenic Sarcoma                            | 2          | 2          |
| <b>Breast</b>                                 | 26 (18.2%) | 21 (16.7%) |
| Adenocarcinoma: TNBC                          | 8          | 6          |
| Adenocarcinoma: ER+/PR-/Her2-                 | 2          | 1          |
| Adenocarcinoma: ER+/PR+/Her2-                 | 2          | 2          |
| Adenocarcinoma: ER-/PR-/Her2+                 | 7          | 6          |
| Adenocarcinoma: ER+/PR-/Her2+                 | 1          | 1          |
| Adenocarcinoma: ER+/PR+/Her2 Eq               | 3          | 2          |
| Adenocarcinoma: ER+/PR+/Her2+                 | 3          | 3          |
| <i>BRCA Positive (driver) among the above</i> | 2          | 1          |
| <b>Cervical</b>                               | 5 (3.5%)   | 5 (3.9%)   |
| Adenocarcinoma                                | 1          | 1          |
| Squamous Cell Carcinoma                       | 4          | 4          |
| <b>Colorectal</b>                             | 14 (9.8%)  | 14 (11.1%) |
| Colon Adenocarcinoma                          | 6          | 6          |
| Rectum Adenocarcinoma                         | 7          | 7          |
| Rectum Adenosquamous Carcinoma                | 1          | 1          |
| <i>KRAS, NRAS positive among the above</i>    | 3,2        | 3,2        |
| <b>Oesophagus</b>                             | 2 (1.4%)   | 2 (1.6%)   |
| Squamous Cell Carcinoma                       | 2          | 2          |
| <i>Her2 positive among all of the above</i>   | 1          | 1          |
| <b>Gastric</b>                                | 7 (4.9%)   | 6 (4.8%)   |
| Adenocarcinoma                                | 7          | 6          |
| <i>Her2 positive among the above</i>          | 1          | 1          |
| <b>Head and Neck</b>                          | 36 (25.2%) | 31 (24.6%) |
| Maxillary Sinus                               | 1          | 1          |
| Nasopharynx                                   | 2          | 2          |
| Oral Cavity                                   | 28         | 23         |
| Oropharynx                                    | 5          | 5          |
| <b>Hepatobiliary</b>                          | 7 (4.9%)   | 6 (4.8%)   |
| Adenocarcinoma – Gallbladder                  | 2          | 2          |
| Cholangiocarcinoma – Bile Duct                | 1          | 1          |

|                                               |            |             |
|-----------------------------------------------|------------|-------------|
| Cholangiocarcinoma – Hepatic                  | 1          | 1           |
| Hepatocellular Adenocarcinoma                 | 3          | 2           |
| <b>Kidney</b>                                 | 4 (2.8%)   | 4 (3.2%)    |
| Clear Cell Carcinoma                          | 3          | 3           |
| Renal Pelvis – Squamous Cell Carcinoma        | 1          | 1           |
| <b>Lung</b>                                   | 7 (4.9%)   | 5 (4.0%)    |
| NSCLC – Adenocarcinoma                        | 4          | 4           |
| NSCLC – Squamous Cell Carcinoma               | 2          | 1           |
| Sarcomatoid Carcinoma                         | 1          | -           |
| <b>Neuroendocrine tumors</b>                  | 3 (2.1%)   | 3 (2.4 %)   |
| Cervix                                        | 1          | 1           |
| Occult Primary                                | 1          | 1           |
| Carcinoid Tumor - Duodenum                    | 1          | 1           |
| <b>Ovarian</b>                                | 9 (6.3%)   | 8 (6.3%)    |
| Adenocarcinoma                                | 3          | 3           |
| Serous Adenocarcinoma                         | 2          | 2           |
| Serous Cystadenocarcinoma                     | 4          | 3           |
| <i>BRCA Positive (driver) among the above</i> | 0          | 0           |
| <b>Pancreatic</b>                             | 8 (5.6%)   | 8 (6.3%)    |
| Adenocarcinoma                                | 4          | 4           |
| Periampullary Adenocarcinoma                  | 3          | 3           |
| Anaplastic Carcinoma                          | 1          | 1           |
| <b>Prostate</b>                               | 1 (0.7%)   | 1 (0.8%)    |
| Adenocarcinoma                                | 1          | 1           |
| <b>Sarcoma</b>                                | 5 (3.5%)   | 4 (3.2%)    |
| Gastrointestinal Stromal Tumor – Rectum       | 1          | 1           |
| Leiomyosarcoma – Retroperitoneum              | 1          | -           |
| Leiomyosarcoma – Uterus                       | 1          | 1           |
| Liposarcoma – Retroperitoneum                 | 1          | 1           |
| Myxofibrosarcoma – Thorax                     | 1          | 1           |
| <b>Skin</b>                                   | 3 (1.8%)   | 3 (2.4%)    |
| Pilomatrical carcinoma                        | 1          | 1           |
| Melanoma                                      | 2          | 2           |
| <b>Testes</b>                                 | 2 (1.2%)   | 2 (1.6%)    |
| Non-seminomatous germ cell tumor              | 1          | 1           |
| Seminoma                                      | 1          | 1           |
| <b>Metastasis</b>                             |            |             |
| Lymph Node                                    | 95 (66.4%) | 84 (66.7 %) |
| Lung                                          | 38 (26.6%) | 35 (27.8 %) |
| Bones                                         | 35 (24.5%) | 30 (23.8 %) |
| Liver                                         | 31 (21.7%) | 31 (24.6 %) |
| Peritoneum                                    | 24 (16.8%) | 23 (18.3 %) |
| Brain                                         | 13 (9.1%)  | 9 (7.9 %)   |
| Soft Tissue                                   | 11 (7.7%)  | 8 (6.3 %)   |
| Bone Marrow                                   | 4 (2.8%)   | 3 (2.4 %)   |

---

**Supplementary Table 2: Prior therapy status of study cohort at baseline**

| Parameter                         | ITT         | Evaluable    |
|-----------------------------------|-------------|--------------|
|                                   | Number (%)  | Number (%)   |
| <b>Prior Therapies Received</b>   |             |              |
| Systemic only                     | 30 (21.0 %) | 26 (20.6 %)  |
| Systemic + Radiotherapy           | 22 (15.4 %) | 21 (12.4 %)  |
| Systemic + Surgery                | 39 (27.3 %) | 34 (20.0 %)  |
| Radiotherapy Surgery              | 0 (0.0 %)   | 0 (0.0 %)    |
| Systemic + Radiotherapy + Surgery | 52 (36.4 %) | 45 (26.5 %)  |
| <b>All Prior Lines of Therapy</b> |             |              |
| 1–2                               | 38 (26.6%)  | 36 (28.6 %)  |
| 3–4                               | 61 (42.7%)  | 52 (41.3 %)  |
| ≥ 5                               | 44 (30.8%)  | 38 (30.2 %)  |
| Minimum lines                     | 1           | 1            |
| Maximum lines                     | 17          | 17           |
| Median lines                      | 3           | 3            |
| <b>Prior Systemic Lines</b>       |             |              |
| 1–2                               | 81 (56.6%)  | 72 (57.1 %)  |
| 3–4                               | 45 (31.5%)  | 39 (31.0 %)  |
| ≥ 5                               | 17 (11.9%)  | 15 (11.9 %)  |
| Minimum lines                     | 1           | 1            |
| Maximum lines                     | 14          | 14           |
| Median lines                      | 2           | 2            |
| <b>Prior Systemic Treatments</b>  |             |              |
| Cytotoxic                         | 136 (95.1%) | 120 (95.2 %) |
| Endocrine                         | 8 (5.6%)    | 8 (6.3 %)    |
| Targeted                          | 37 (25.9%)  | 33 (26.2 %)  |
| <b>Prior Surgeries</b>            |             |              |
| None                              | 52 (36.4 %) | 47 (37.3 %)  |
| 1                                 | 67 (46.9 %) | 58 (46.0 %)  |
| ≥ 2                               | 24 (16.8 %) | 21 (16.7 %)  |
| <b>Prior Irradiation</b>          |             |              |
| None                              | 69 (48.3 %) | 60 (47.6 %)  |
| 1                                 | 56 (39.2 %) | 48 (38.1 %)  |
| ≥ 2                               | 18 (12.6 %) | 18 (14.3 %)  |

**Supplementary Table 3: Patient-wise extent of disease and metastatic sites.** See Supplementary Table 3

**Supplementary Table 4: Patient-wise details of prior lines of treatment, ETA-guided treatments and indications for ETA-guided treatments.** See Supplementary Table 4

**Supplementary Table 5: Metastases, objective response rate and clinical benefit rate**

| Site (Organ) | Status of Metastasis | Number of patients | Objective Response Rate |                        | Clinical Benefit Rate (Final) |
|--------------|----------------------|--------------------|-------------------------|------------------------|-------------------------------|
|              |                      |                    | Best                    | Final                  |                               |
| Lung         | Absent               | 91                 | 44.0%<br>(34.2%–54.2%)  | 38.5%<br>(34.2%–54.2%) | 91.2%<br>(83.4%–95.7%)        |
|              | Present              | 35                 | 37.1%<br>(23.1%–53.7%)  | 34.3%<br>(20.8%–50.9%) | 88.6%<br>(73.5%–96.1%)        |
| Liver        | Absent               | 95                 | 44.2%<br>(34.6%–54.2%)  | 38.9%<br>(29.7%–49.0%) | 91.6%<br>(84.0%–95.9%)        |
|              | Present              | 31                 | 35.5%<br>(21.1%–53.1%)  | 32.3%<br>(18.5%–49.9%) | 87.1%<br>(70.6%–95.5%)        |
| Brain        | Absent               | 117                | 41.0%<br>(32.5%–50.1%)  | 35.9%<br>(27.8%–44.9%) | 89.7%<br>(82.8%–94.2%)        |
|              | Present              | 9                  | 55.6%<br>(26.6%–81.2%)  | 55.6%<br>(26.6%–81.2%) | 100.0%<br>(65.5%–100.0%)      |

ORR and CBR were evaluated in patients as described. Patients were stratified on the basis of presence or absence of metastases to lung, liver or brain at baseline (recruitment). Neither ORR nor CBR appeared to be significantly influenced by presence or absence of metastases to these organs. Figures within parentheses represent 95% Confidence Intervals (CI).

**Supplementary Table 6: Study designs in perspective**

| Parameter                | Study identifier |            |             |          |          |           |           |
|--------------------------|------------------|------------|-------------|----------|----------|-----------|-----------|
|                          | SHIVA            | My Pathway | MD Anderson | MOSCATO  | Von Hoff | NCI-Match | RESILIENT |
| STUDY DESIGN             |                  |            |             |          |          |           |           |
| Molecular Filter         | Yes              | Yes        | Yes         | Yes      | Yes      | Yes       | No        |
| MOLECULAR INDICATIONS    |                  |            |             |          |          |           |           |
| SNV                      | Y                | Y          | Y           | Y        | -        | Y         | Y         |
| CNA                      | -                | -          | -           | Y        | -        | Y         | Y         |
| Rearrangements           | -                | -          | Y           | -        | -        | Y         | Y         |
| Indels                   | -                | -          | -           | Y        | -        | Y         | Y         |
| IHC                      | Y                | Y          | Y           | Y        | Y        | -         | Y         |
| DGE                      | -                | Y          | -           | Y        | Y        | -         | Y         |
| LIVE TUMOR CELL ANALYSIS |                  |            |             |          |          |           |           |
| Chemo-Sensitivity        | -                | -          | -           | -        | -        | -         | Y         |
| MOLECULAR COVERAGE       |                  |            |             |          |          |           |           |
| Genes for DNA            | 21               | 4          | 11          | 75       | -        | (varying) | 409       |
| Genes for RNA            | 3                | 1          | -           | (RNASeq) | 62       | -         | >20000    |
| THERAPY PROFILE          |                  |            |             |          |          |           |           |
| Cytotoxic                | -                | -          | Y           | Y        | Y        | -         | Y         |
| Targeted                 | Y                | Y          | Y           | Y        | Y        | Y         | Y         |
| Endocrine                | Y                | -          | -           | Y        | Y        | Y         | Y         |
| Experimental             | -                | -          | Y           | -        | -        | Y         | -         |

As compared to the largely univariate indications for therapy selection in other trials, the scope of investigations in the RESILIENT trial provided a significantly more comprehensive multi-layered view of the tumor's molecular and functional landscape, which facilitated more meaningful therapy selection for patients.

SNV: Single Nucleotide Variations; CNA: Copy Number Alterations; Indels: Insertions and Deletions; IHC: Immunohistochemistry; DGE: Differential Gene Expression.

**Supplementary Table 7: Impact of exclusion criteria/molecular filter on outcomes**

| # | Parameter                      | Study Identifier |             |             |         |          |            |           |
|---|--------------------------------|------------------|-------------|-------------|---------|----------|------------|-----------|
|   |                                | SHIVA            | My Pathway* | MD Anderson | MOSCATO | Von Hoff | NCI-Match* | RESILIENT |
| 1 | Patients Screened              | 741              | N.R.        | 1283        | 1035    | 106      | N.R.       | 231       |
| 2 | Data Available (A)             | 496              | N.R.        | 1144        | 843     | 86       | N.R.       | 190       |
| 3 | Molecular Filter               | Yes              | Yes         | Yes         | Yes     | Yes      | Yes        | None      |
| 3 | Treatable Patients (B)         | 293              | 251         | 460         | 411     | 84       | N.R.       | 190       |
| 4 | Patients Treated               | 195              | 251         | 211         | 199     | 66       | 177        | 143       |
| 5 | Correction Factor <sup>#</sup> | 0.59             | 0.05        | 0.40        | 0.49    | 0.98     | 0.09**     | 1.00      |
| 6 | Evaluable Patients             | 195              | 251         | 211         | 193     | 66       | 177        | 126       |
| 7 | ORR Reported                   | 4.1%             | 23%         | 27%         | 11%     | 9.1%     | 8.1%       | 42.9%**   |
| 8 | ORR Adjusted <sup>@</sup>      | 2.4%             | 1.15%       | 10.8%       | 5.4%    | 8.9%     | 0.73%      | 42.9%**   |

The Comparator trials in this table employed a molecular feature-based exclusion filter which enrolled only those patients where the tumor harboured pre-defined molecular features. This inclusion bias was factored in to evaluate the real-world outcome rates among the larger patient population who were initially considered for treatment. RESILIENT did not include any such exclusion filter due to which the outcome rates are unaffected.

\*Interim Data. <sup>#</sup>Correction Factor = B/A (= Treatable Patients/Patients where Available). <sup>@</sup>ORR Adjusted = ORR Reported / Correction Factor. <sup>@</sup>CBR Adjusted = CBR reported × Correction Factor. \*\*Observed patient accrual rate of ~9% for 10 arms. (<http://ecog-acrin.org/nci-match-eay131/interim-analysis>). \*\*ORR in ITT population indicated in Results section.

**Supplementary Table 8: ORR of SoC agents and checkpoint inhibitors**

| Cancer Type   | Treatment Option/Modality | Objective Response Rate |
|---------------|---------------------------|-------------------------|
| Head and Neck | Methotexate (SoC)         | 3.9                     |
|               | Nivolumab                 | 13.3                    |
|               | Pembrolizumab             | 18                      |
|               | RESILIENT                 | 45.2                    |
|               | Regorafenib (SoC)         | 1.0                     |
| Colorectal    | Nivolumab                 | 0.0                     |
|               | Pembrolizumab             | 0.0                     |
|               | RESILIENT                 | 35.7                    |

After failure of initial-line therapy in advanced Head and Neck cancers (HNSCC) or Colorectal cancers (CRC), Methotrexate and Pemetrexed are respectively considered as next line chemotherapy agents. Checkpoint inhibitors approved for use in similar setting in HNSCC and CRC include Pembrolizumab and Nivolumab. All CRC in RESILIENT were proficient in mismatch repair (pMMR), i.e., Microsatellite Stable (MS-S), where single Checkpoint inhibitors are not reported to yield objective response.

**Supplementary Table 9: Comparison of 90-day PFS rates across various studies**

| <b>Study Identifier</b> | <b>Cancer Types</b>              | <b>Intervention</b> | <b>PFS Rate (90-Day)</b> |
|-------------------------|----------------------------------|---------------------|--------------------------|
| Keynote-016 (c)         | Colorectal,<br>MMR-proficient    | Pembrolizumab       | 10                       |
| Keynote-012 (b)         | Head and Neck,<br>PD-L1 Negative | Pembrolizumab       | 25                       |
| SHIVA                   | All solid organ malignancies     | Patient-specific    | 40                       |
| Keynote-012 (a)         | Head and Neck,<br>PD-L1 Positive | Pembrolizumab       | 40                       |
| Checkmate-141           | Head and Neck,<br>All PD-L1      | Nivolumab           | 40                       |
| Checkmate-142           | Colorectal,<br>MMR-deficient     | Nivolumab           | 65                       |
| MD Anderson             | All solid organ malignancies     | Patient-specific    | 70                       |
| Keynote-016 (b)         | Non-Colorectal,<br>MMR-deficient | Pembrolizumab       | 80                       |
| Keynote-016 (a)         | Colorectal,<br>MMR-deficient     | Pembrolizumab       | 90                       |
| Resilient               | All solid organ malignancies     | Patient-specific    | 94                       |
